# Supplementary figures and images for: Prognostic nomograms for locally advanced cervical cancer based on the SEER database: Integrating Cox regression and competing risk analysis
Source: PubMed Central journal article supplement — Medicine (Baltimore). 2024 Nov 8;103(45):e40408. doi: 10.1097/MD.0000000000040408 (PMC11557032; doi:10.1097/md.0000000000040408), 2024-11-08

SDC Figure 1

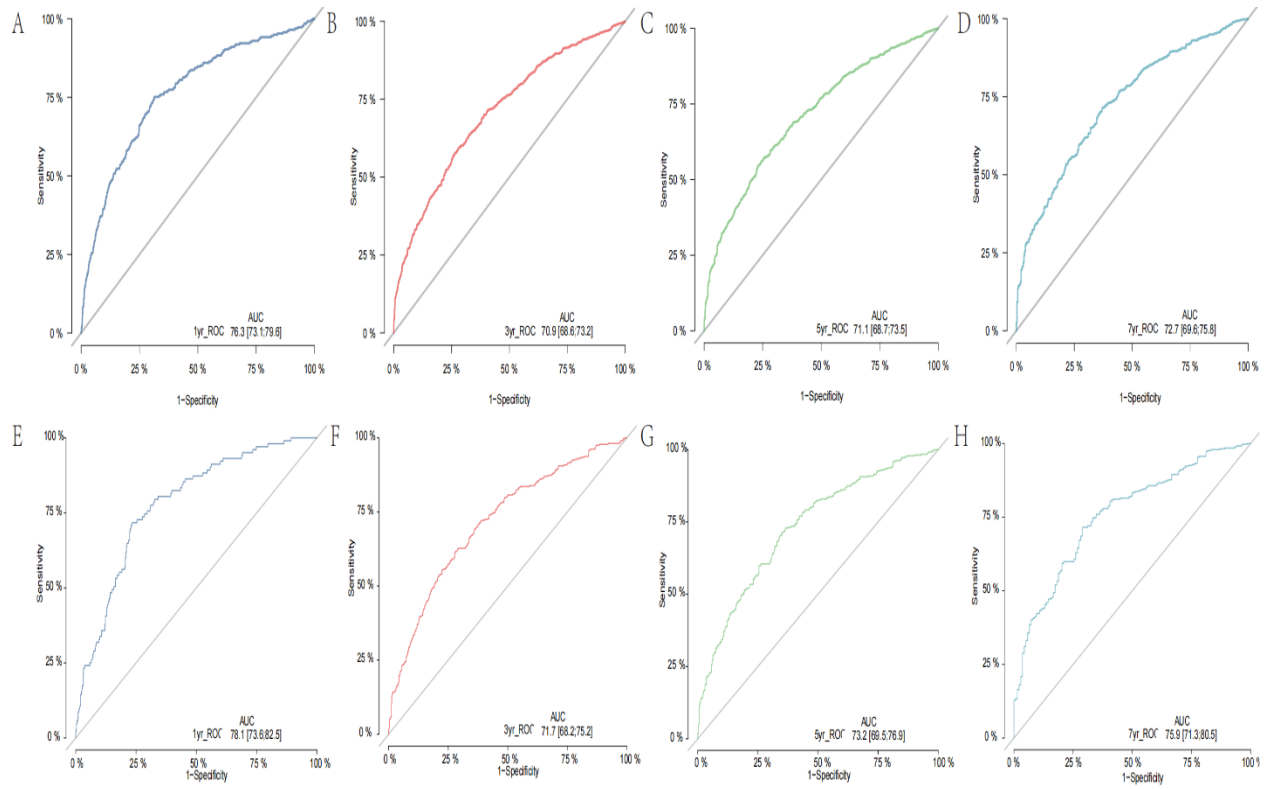

SDC Figure 2

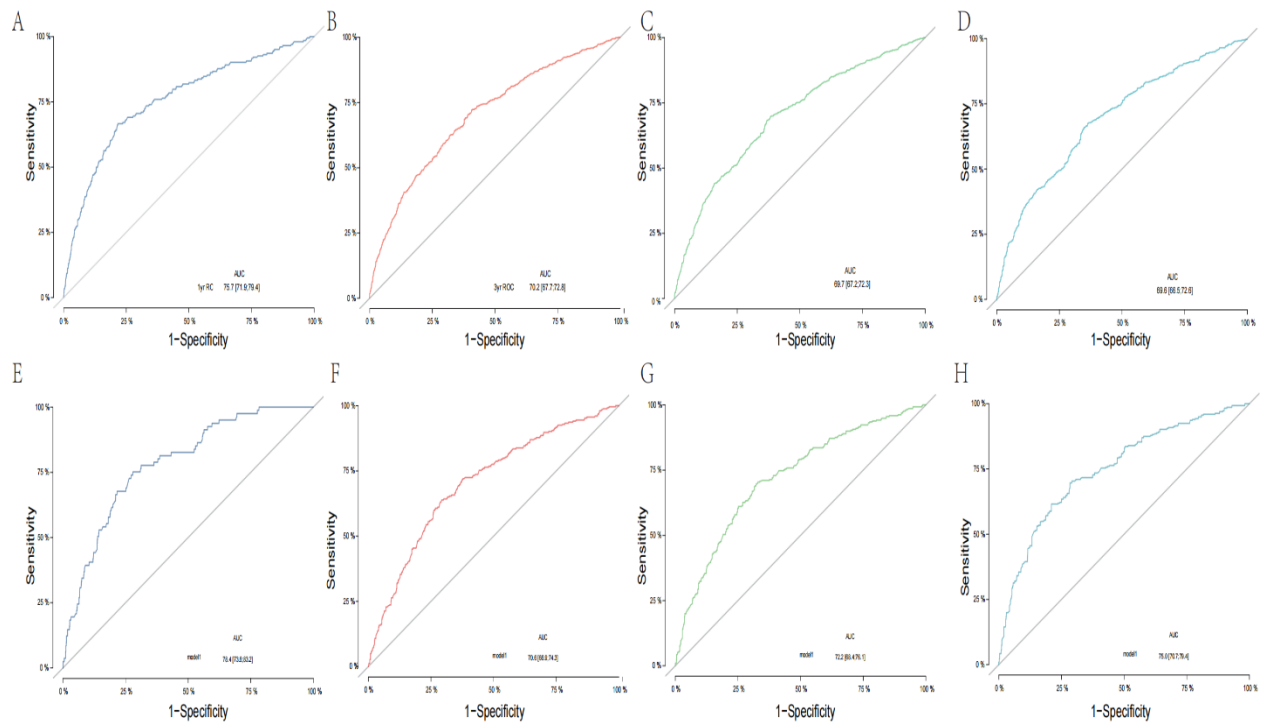

SDC Figure 3

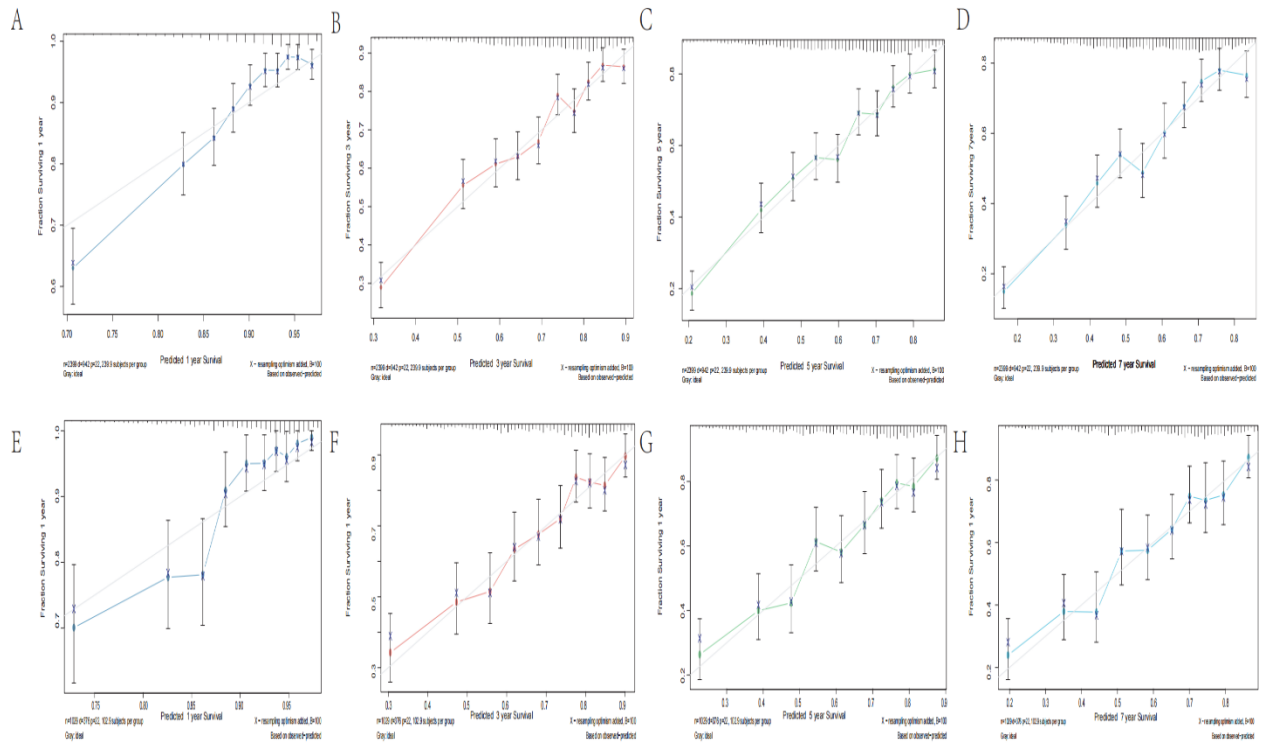

SDC Figure 4

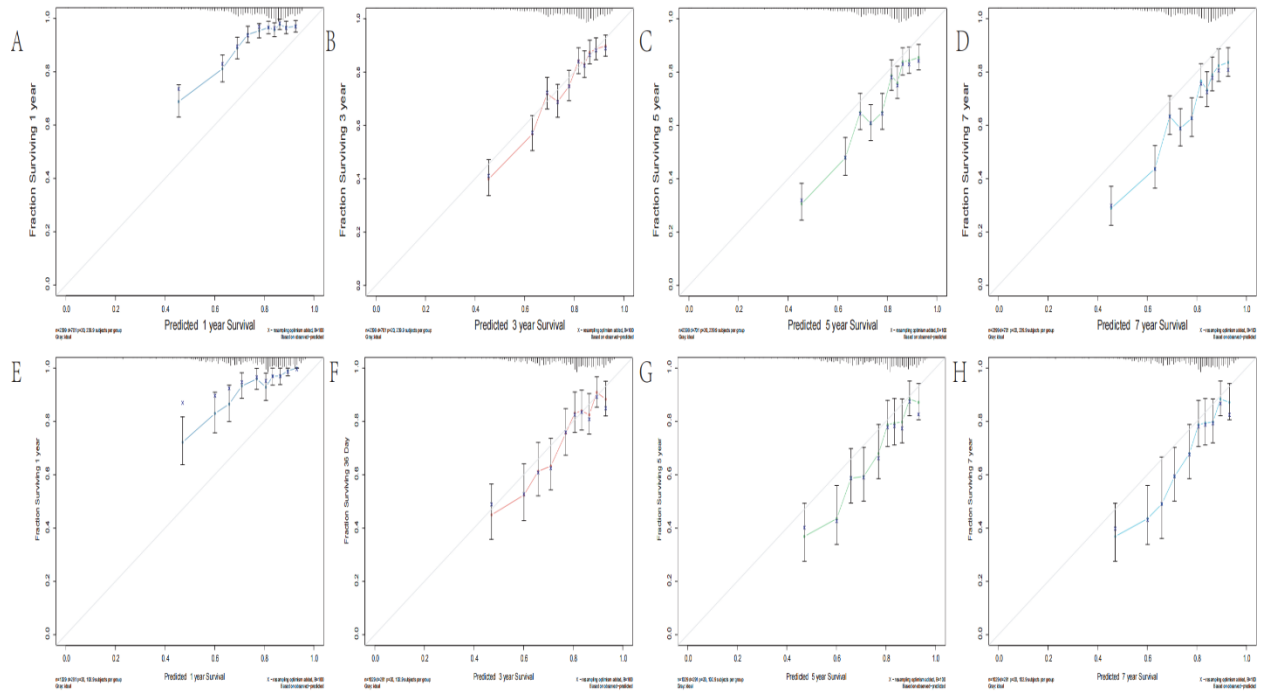

SDC Figure 5

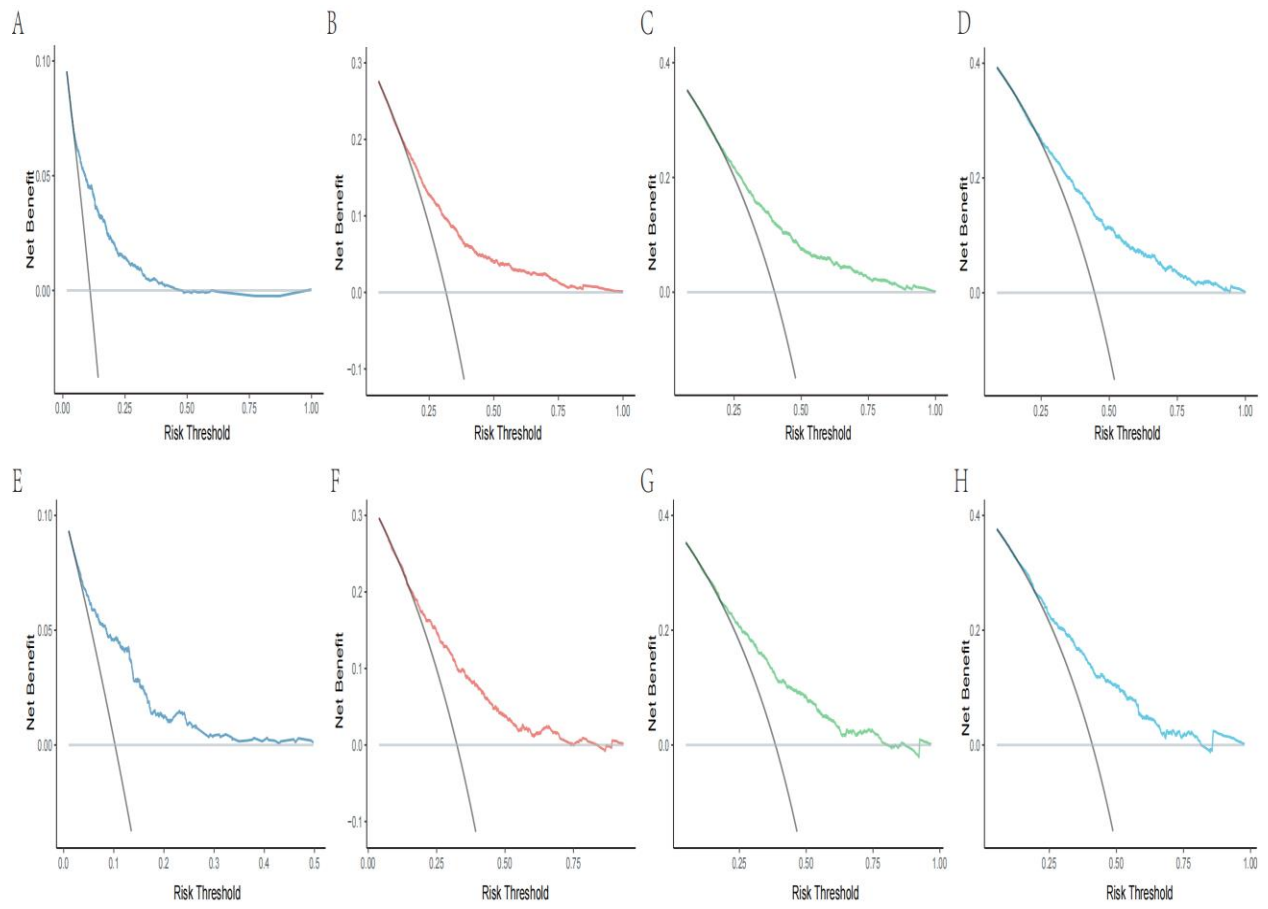

SDC Figure 6

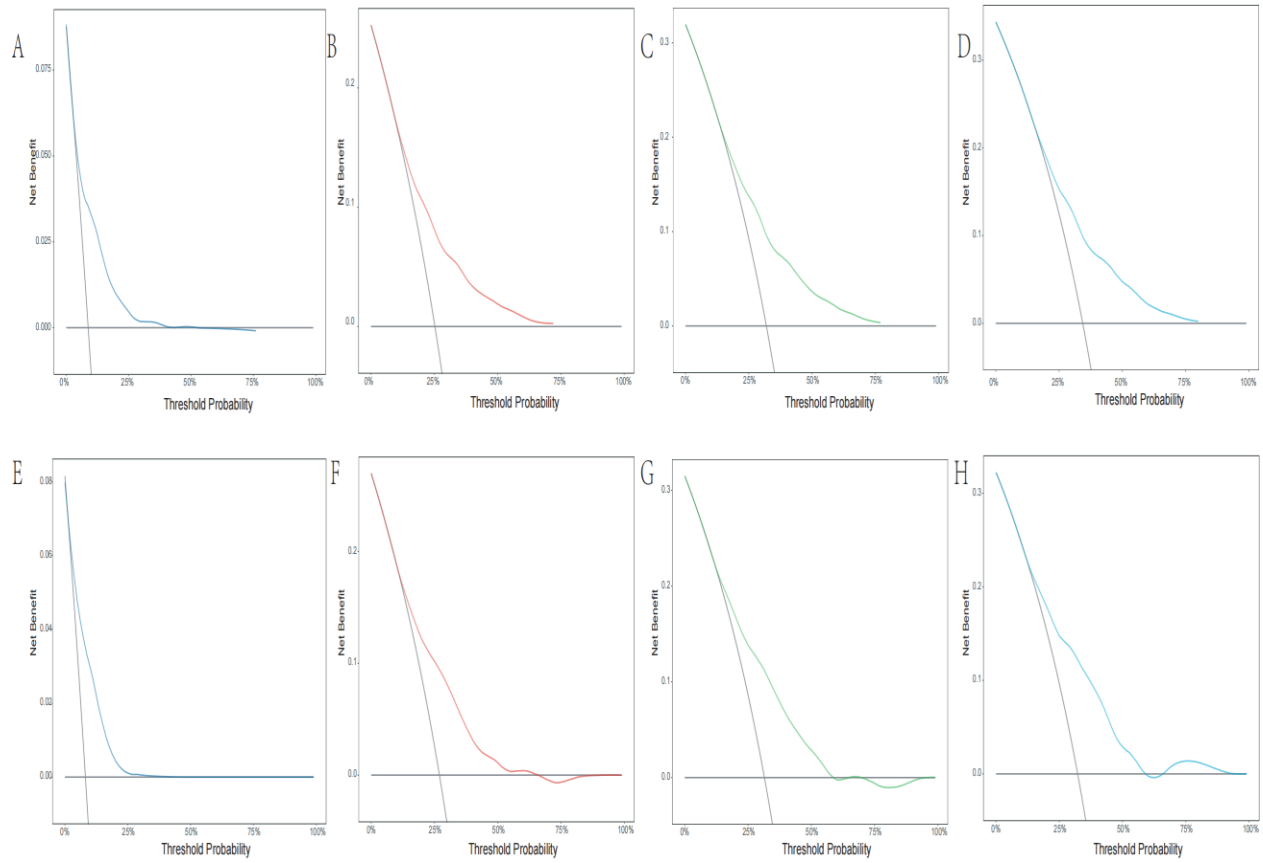

Supplement: medi-103-e40408-s001.pdf [file medi-103-e40408-s001.pdf]
